# Risks inherent to mitochondrial replacement

Edward H. Morrow<sup>a</sup>, Klaus Reinhardt<sup>b</sup>, Jonci N Wolff<sup>c</sup>, & Damian K Dowling<sup>c</sup>

<sup>a</sup>*Evolution, Behaviour and Environment Group, School of Life Sciences, University of Sussex, Brighton BN1 9QG, UK.*

<sup>b</sup>*Applied Zoology, Department of Biology, Technische Universitaet Dresden, 01062 Dresden,*

<sup>c</sup>*School of Biological Sciences, Monash University, 3800 Victoria, Australia*

The UK Government has recently been debating whether or not to legislate to allow *mitochondrial replacement* (MR) to be used in the clinic. However, we are concerned that some of the science of MR has been misunderstood, or otherwise given only fleeting consideration. We set out our arguments below and offer a way forward to ensure that MR can safely deliver the health benefits it promises for those suffering from mitochondrial-related diseases

Recent innovations that enable mitochondrial DNA (mtDNA) mutations to be eliminated from the germline, by replacing mutated mitochondria within an oocyte with mitochondria from a healthy donor female<sup>1-3</sup>, offer hope for the eradication of several debilitating and lethal mitochondrial diseases. The potential for clinical application of MR has received widespread support<sup>4,5</sup>, but has also provoked safety and ethical concerns from the public and biomedical practitioners<sup>4,6</sup>. In addition to currently addressed safety concerns related to technical details of the procedures<sup>7</sup>, a further safety concern exists that cannot be easily addressed by methodological refinements. Embryos produced by all variants of MR (pronuclear transfer; maternal spindle transfer; polar body transfer) will acquire genetic material from three different individuals (nuclear DNA from the prospective parents, and mtDNA from a donor female), and some of these novel combinations of genetic material may not be fully compatible with one another (i.e. may be mismatched). For example, various combinations of donor mtDNA and recipient nuclear genomes have experimentally been shown to negatively affect offspring health and fitness in vertebrate and invertebrate

models, even though the donated mitochondria were putatively healthy<sup>8</sup>. This evidence has, however, been suggested to have low relevance to humans<sup>3,7,9,10</sup> for three proposed reasons (Box 1). Here we address each of those reasons, and explain why none of them refute compellingly the potential for mitochondrial-nuclear (mito-nuclear) mismatches to affect the outcomes of MR in humans.

**Box 1. Three proposed reasons why MR should not result in alterations of human phenotypes**

**Reason 1. MR, like sexual reproduction, randomly shuffles mitochondrial and nuclear genomes each generation.**

This is based on the argument that sexual reproduction results in the random mixing of two parental genomes. Thus, under sexual reproduction, the father's haploid genome is as evolutionarily 'foreign' to the mother's mtDNA, as will the mother's nuclear genome be to a donor's mtDNA under MR<sup>9</sup>. Under the additional assumption that the mito-nuclear combinations found in the offspring are a random subset of those determined at fertilization (i.e. the absence of selection is assumed), there will be little scope for high performing mito-nuclear allelic combinations to be preserved across generations. MR has therefore been described as being equivalent to sexual reproduction, in terms of generating healthy offspring containing novel combinations of mitochondrial and nuclear alleles. In section 1, we explain why the process of co-transmission of mtDNA and maternal nuclear DNA, coupled with selection, renders this proposed reason unconvincing.

**Reason 2. Genetic diversity in humans is too low to cause incompatibilities.**

It has been suggested that mito-nuclear mismatches are unlikely to occur in humans because the genetic diversity within the human population is so small that any disruptions will be negligible<sup>7</sup>. It has been argued that mito-nuclear compatibility should be widespread, given that humans are "a freely interbreeding species"<sup>10</sup>. In section 2, we outline why the potential for mito-nuclear incompatibilities in humans remains a credible possibility.

### **Reason 3. Incompatibilities do not occur in non-human primates.**

Empirical data in a primate model<sup>3</sup> has been used as evidence that mito-nuclear mismatching will not occur, or will not be important, in humans. This reasoning is based on the production of four healthy male macaques born to three mothers, following MR-assisted IVF attempts on twelve mothers<sup>3</sup>. The individuals were apparently derived from two distinct, although unspecified<sup>1</sup>, sub-species of *Macaca mulatta*<sup>9</sup>. In section 3, we outline why the macaque studies, to date, do not provide a strong base on which to dispel concerns regarding mito-nuclear incompatibilities manifesting in humans.

## **1. MR is more likely than sexual reproduction to disrupt coevolved mito-nuclear genetic combinations**

**1.1 Co-transmission.** During sexual reproduction, but not during MR, offspring invariably receive an entire haploid copy of the nuclear genome from their mother, alongside their maternally-inherited mtDNA. In other words, mitochondrial alleles co-transmit with 50% of the autosomal nuclear alleles in 100% of the cases (and with two-thirds of the X-chromosome linked alleles, since females carry two copies of the X-chromosome and males carry only one). In contrast to sexual reproduction, MR can create entirely novel allelic combinations of mito-nuclear genotypes, because the mtDNA has been donated from a third-party (the donor female) – thus the co-transmission rate between the patient's nuclear DNA and the donated mtDNA is 0%.

**1.2 Selection.** The co-transmission of mtDNA and nuclear alleles facilitates the preservation of high performing (coevolved) combinations, across generations. The greater the percentage of co-transmission between mtDNA and nuclear DNA, the higher the potential for mito-nuclear co-adaptation. In natural conceptions, embryos carrying better-performing mito-nuclear allelic combinations may be more likely to survive through development, to reach reproductive age, and ultimately to successfully reproduce. Because the best-performing combinations may be more likely to be passed on, coadapted mito-nuclear allelic pairings are likely to be preserved across generations within any particular maternal lineage. Similarly, germline selection against incompatible mito-nuclear combinations

might occur at the oocyte stage, with poorly-performing oocytes potentially re-adsorbed. By contrast, MR-assisted IVF creates combinations of mito-nuclear alleles that are potentially novel (i.e. never before placed together), and not previously screened by natural selection (or previously screened and selected against). This lack of prior screening means that the sample of oocytes and embryos created under MR will contain individuals that may be inherently more likely to exhibit incompatibilities between the mitochondrial and nuclear genomes<sup>8</sup>. The mito-nuclear allelic combinations carried by the offspring will be under selection across life-stages, from before fertilization through to the sexually mature adult (with this selection manifested as differential patterns of survival or fertility among offspring carrying different mito-nuclear allelic combinations). Reduced fertility, especially of males, as a result of epistatic interactions during hybridization between alleles at different loci, including those spanning different genomes, is expected theoretically<sup>11</sup> and supported empirically, including for mito-nuclear complexes in *Drosophila melanogaster*<sup>12,13</sup>.

## 2. Genetic diversity in humans

The human population is generally thought to show lower mean levels of genetic divergence at nuclear loci than other species<sup>e.g.</sup> <sup>14</sup>. While the probability of MR resulting in mito-nuclear incompatibilities would presumably be low if there was complete genetic admixture within the nuclear genome, it is clear that genetic population stratification does exist<sup>15-17</sup>. This stratification has its origins in historical and demographic patterns of selection and migration<sup>18</sup>, and positive assortative mating between individuals of similar phenotypes may contribute to its maintenance<sup>19,20</sup>.

However, the level of divergence across mtDNA sequences is also relevant when it comes to the question of whether or not MR may result in mismatched mito-nuclear genotypes. In humans, the percentage divergence in mtDNA between major human haplogroups is around 0.5% (Fig 1, Table S1), essentially equivalent to the divergence exhibited across mtDNA haplotypes within the fruit fly, *D. melanogaster* (0.4%; Fig 1, Table S2), which exhibit clear signatures of

133 mito-nuclear incompatibilities, particularly in males<sup>12,13</sup>. Haplogroup matching,  
134 proposed as a way of circumventing this issue<sup>21,22</sup>, might not always be  
135 successful in preventing mito-nuclear incompatibilities. By definition, when  
136 probing variation within human macro-haplogroups, divergence across mtDNA  
137 haplotypes will persist (~0.1%, see Table S3 for estimates within haplogroup H,  
138 the most common European macro-haplogroup, or 0.2% if the non-coding region  
139 is included in the analysis [Fig 1]; similar patterns are found within H1 [Table S4,  
140 Fig 1]). The mechanisms of the incompatibilities are largely unknown and the  
141 identity of the causative interacting loci is undetermined<sup>23</sup>. However, it seems  
142 that several loci of small effect are involved in *Drosophila*<sup>24</sup>. While this suggests  
143 that less distantly-related genomes may result in smaller incompatibility  
144 effects<sup>24</sup>, it will be difficult to make predictions about the likelihood of  
145 incompatibilities based on the specific alleles that delineate haplotypes, given  
146 that it has been previously shown that single nucleotide differences in the  
147 mtDNA can cause male sterility when interacting with particular nuclear  
148 genotypes<sup>13,25</sup>. Further research into the degree of mismatch manifested with  
149 increasing mitochondrial genetic divergence between putative donor and  
150 patients should be a priority.

151

### 152 **3. Proof-of-principle studies do not allow epidemiological predictions of** 153 **incompatibilities**

154 Several studies demonstrated the technical feasibility of surgical MR<sup>1-3,26</sup>, using  
155 macaques, human cell lines and mice. The number of mitochondrial × nuclear  
156 genotype combinations covered by all these studies together appears to be 15, or  
157 less. In addition, with the exception of two studies<sup>3,27</sup>, no maternal replicates  
158 were used per mito-nuclear combination, preventing an examination of whether  
159 any effect is due to a particular maternal effect associated with the study subject  
160 or inherent to a particular mitochondrial × nuclear genotype combination. In  
161 other words, these studies<sup>1-3,26,27</sup> were not designed to test for mito-nuclear  
162 incompatibilities, and cannot be used to predict the population-wide likelihood  
163 of mito-nuclear incompatibilities manifesting post-MR. Doing so will likely lead  
164 to a high rate of Type II errors – the failure to detect effects that are present.

165

166 There are also additional issues with some of these studies. For example,  
 167 Tachibana et al.<sup>3</sup> used 98 human oocytes (from 7 donors) for MR, and concluded,  
 168 there was no difference in zygote survival to normal IVF controls. However, this  
 169 conclusion might warrant reappraisal. In their study, the authors derived six  
 170 embryonic stem cells (ESCs), from 19 blastocysts, from a starting stock of 64  
 171 oocytes that underwent MR treatment (ESC success rate:  $6/64 = 9\%$ , blastocyst  
 172 rate:  $19/64 = 30\%$ ). This compares to nine ESCs, from 16 blastocysts, from a  
 173 starting stock of 33 oocytes in the control group (ESC rate:  $9/33 = 27\%$ ,  
 174 blastocyst rate:  $16/33 = 48\%$ ). The differences in ESC isolation rate between  
 175 treatment and control groups are in fact statistically significant (ESC: Fisher's  
 176 exact test, 1df, two-tailed,  $p = 0.035$ ; Blastocysts:  $p = 0.078$ ). This suggests  
 177 further evaluation of developmental success post-MR should be a priority.

178  
 179 Paull et al.<sup>26</sup> obtained 7 blastocysts out of 18 MR oocytes. The cell lines derived  
 180 from these blastocysts showed lower activity in all four respiratory chain  
 181 enzyme complexes than control cells. While differences were not statistically  
 182 significant, they represent reductions of between 2 to 19 % (average across four  
 183 enzymes: 11%) compared to parthenogenetically-induced controls, and given the  
 184 low sample sizes involved, again suggest that further scrutiny into possible  
 185 effects of MR is warranted.

186  
 187 Finally, Craven et al.<sup>2</sup> report that development to blastocyst stage was  
 188 approximately 50% lower for zygotes receiving MR treatment ( $18/80 = 22.5\%$ )  
 189 than for controls; a difference that is likely to be statistically significant, although  
 190 the controls were unmanipulated and therefore do not represent a true control  
 191 for the manipulation.

192  
 193 In the light of these three examples, it is noteworthy, that MR affected  
 194 development and respiration in many other studies on non-primate vertebrates  
 195 and invertebrates<sup>8</sup>.

196

## 197 **Conclusions**

198 MR-assisted IVF could place novel allelic combinations of interacting mtDNA and  
199 nuclear genes alongside each other in the offspring, and these combinations  
200 might not have been previously screened by selection (or in the worst case may  
201 have already been removed from the population by selection). Therefore, mito-  
202 nuclear allelic combinations created following MR (which are characterized by  
203 0% co-transmission from parents to offspring) are theoretically not equivalent to  
204 those found in individuals produced under sexual reproduction. This insight is of  
205 fundamental importance, but apparently underappreciated in the literature  
206 pertaining to MR. Given that mito-nuclear allelic combinations contribute to  
207 encoding life's critical function of energy conversion, natural selection must be  
208 assumed to be particularly intense on these combinations. We suggest that it is a  
209 real possibility that novel combinations created under MR could result in mito-  
210 nuclear mismatches. This possibility has also been predicted by evolutionary  
211 theory<sup>28</sup> and experimentally supported in several taxa<sup>8,29</sup>, including several with  
212 comparable levels of mitochondrial genetic diversity to the human  
213 population<sup>12,13</sup>.

214  
215 Lack of evidence from small-scale proof-of-principle experiments for MR effects  
216 should not be used to conclude mito-nuclear incompatibilities are unlikely to  
217 manifest post-MR, because these experiments cover few mito-nuclear  
218 combinations and their statistical inferences, in some cases, appear open to  
219 question. In fact, there is actually an extensive, but largely overlooked, body of  
220 experimental evidence that indicates mito-nuclear interactions are important in  
221 determining health outcomes in humans<sup>30-42</sup>, as well evidence for mito-nuclear  
222 incompatibilities following the similar procedure of somatic cell nuclear transfer  
223 in cattle<sup>43,44</sup>. Furthermore, the only previous attempt of using pronuclear  
224 transfer in humans was not successful<sup>45</sup>. Future work should, therefore, address  
225 to what extent the risk of mismatching can be reduced by matching the donor  
226 and maternal mitochondrial haplotypes, since genetic variation across many  
227 interacting loci are likely to be involved<sup>24</sup>, and given the genetic variation  
228 between and within human mtDNA haplogroups that we have outlined here. As a  
229 suggested design, two oocytes should be used for every donor; each enucleated.  
230 One of these is assigned to a control, and re-populated with the donor's own

231 nuclear genetic material, and the other to the MR treatment. By then comparing  
232 the success of MR-treated to control eggs, and provided sufficient replication  
233 across donors, this design would provide an explicit test for mito-nuclear  
234 incompatibilities post-MR.

235

## 236 Acknowledgements

237 Funding was provided by Royal Society University Research Fellowship and  
238 European Research Council (to EHM), the VolkswagenFoundation and the  
239 Zukunftskonzept at TU Dresden funded by the Exzellenzinitiative of the Deutsche  
240 Forschungsgemeinschaft (to KR), and the Australian Research Council (to DKD).

241

## 242 References

- 243 1. Tachibana, M. *et al.* Mitochondrial gene replacement in primate offspring and  
244 embryonic stem cells. *Nature* **461**, 367–372 (2009).
- 245 2. Craven, L. *et al.* Pronuclear transfer in human embryos to prevent  
246 transmission of mitochondrial DNA disease. *Nature* **465**, 82–85 (2010).
- 247 3. Tachibana, M. *et al.* Towards germline gene therapy of inherited mitochondrial  
248 diseases. *Nature* **493**, 627–631 (2013).
- 249 4. Human Fertilisation and Embryology Authority, S. and I. D. Review of scientific  
250 methods to avoid mitochondrial disease 2011 - HFEA. at  
251 <<http://www.hfea.gov.uk/6372.html>>
- 252 5. Department of Health. Serious mitochondrial disease: new techniques to  
253 prevent transmission - Consultations - GOV.UK. at  
254 <[https://www.gov.uk/government/consultations/serious-mitochondrial-](https://www.gov.uk/government/consultations/serious-mitochondrial-disease-new-techniques-to-prevent-transmission)  
255 [disease-new-techniques-to-prevent-transmission](https://www.gov.uk/government/consultations/serious-mitochondrial-disease-new-techniques-to-prevent-transmission)>
- 256 6. Mitochondrial DNA disorders | Nuffield Council on Bioethics. at  
257 <<http://www.nuffieldbioethics.org/mitochondrial-dna-disorders>>
- 258 7. Tanaka, A. J., Sauer, M. V., Egli, D. & Kort, D. H. Harnessing the Stem Cell  
259 Potential: The path to prevent mitochondrial disease. *Nat. Med.* **19**, 1578–  
260 1579 (2013).
- 261 8. Reinhardt, K., Dowling, D. K. & Morrow, E. H. Mitochondrial Replacement,  
262 Evolution, and the Clinic. *Science* **341**, 1345–1346 (2013).
- 263 9. Human Fertilisation and Embryology Authority, S. and I. D. HFEA statement  
264 regarding the Klaus Reinhardt et al Science paper ‘Mitochondrial  
265 replacement, evolution, and the clinic’. at  
266 <<http://www.hfea.gov.uk/8178.html>>
- 267 10. Expert reaction to mitochondrial replacement and evolution | Science Media  
268 Centre. at <[http://www.sciencemediacentre.org/expert-reaction-to-](http://www.sciencemediacentre.org/expert-reaction-to-mitochondrial-replacement-and-evolution/)  
269 [mitochondrial-replacement-and-evolution/](http://www.sciencemediacentre.org/expert-reaction-to-mitochondrial-replacement-and-evolution/)>
- 270 11. Dobzhansky, T. *Genetics and the origin of species*. (Columbia University Press,  
271 1937).



- 272 12. Innocenti, P., Morrow, E. H. & Dowling, D. K. Experimental Evidence Supports  
273 a Sex-Specific Selective Sieve in Mitochondrial Genome Evolution. *Science*  
274 **332**, 845–848 (2011).
- 275 13. Yee, W. K. W., Sutton, K. L. & Dowling, D. K. In vivo male fertility is affected by  
276 naturally occurring mitochondrial haplotypes. *Curr. Biol.* **23**, R55–R56  
277 (2013).
- 278 14. Li, W. H. & Sadler, L. A. Low Nucleotide Diversity in Man. *Genetics* **129**, 513–  
279 523 (1991).
- 280 15. Rosenberg, N. A. *et al.* Genetic Structure of Human Populations. *Science* **298**,  
281 2381–2385 (2002).
- 282 16. Jakobsson, M. *et al.* Genotype, haplotype and copy-number variation in  
283 worldwide human populations. *Nature* **451**, 998–1003 (2008).
- 284 17. Redon, R. *et al.* Global variation in copy number in the human genome.  
285 *Nature* **444**, 444–454 (2006).
- 286 18. Balaesque, P. L., Ballereau, S. J. & Jobling, M. A. Challenges in human genetic  
287 diversity: demographic history and adaptation. *Hum. Mol. Genet.* **16**, R134–  
288 R139 (2007).
- 289 19. Thiessen, D. & Gregg, B. Human assortative mating and genetic equilibrium:  
290 An evolutionary perspective. *Ethol. Sociobiol.* **1**, 111–140 (1980).
- 291 20. Maes, H. H., Neale, M. C. & Eaves, L. J. Genetic and environmental factors in  
292 relative body weight and human adiposity. *Behav. Genet.* **27**, 325–351 (1997).
- 293 21. Vogel, G. FDA Considers Trials of ‘Three-Parent Embryos’. *Science* **343**, 827–  
294 828 (2014).
- 295 22. Wolf, D. P., Mitalipov, N. & Mitalipov, S. Mitochondrial replacement therapy in  
296 reproductive medicine. *Trends Mol. Med.* **0**,
- 297 23. Horan, M. P., Gemmell, N. J. & Wolff, J. N. From evolutionary bystander to  
298 master manipulator: the emerging roles for the mitochondrial genome as a  
299 modulator of nuclear gene expression. *Eur. J. Hum. Genet.* **21**, 1335–1337  
300 (2013).
- 301 24. Camus, M. F., Clancy, D. J. & Dowling, D. K. Mitochondria, Maternal Inheritance,  
302 and Male Aging. *Curr. Biol.* **22**, 1717–1721 (2012).
- 303 25. Clancy, D. J., Hime, G. R. & Shirras, A. D. Cytoplasmic male sterility in  
304 *Drosophila melanogaster* associated with a mitochondrial CYTB variant.  
305 *Heredity* **107**, 374–376 (2011).
- 306 26. Paull, D. *et al.* Nuclear genome transfer in human oocytes eliminates  
307 mitochondrial DNA variants. *Nature* **493**, 632–637 (2013).
- 308 27. Wang, T. *et al.* Polar body genome transfer for preventing the transmission of  
309 inherited mitochondrial diseases. *Cell* **157**, 1591–1604 (2014).
- 310 28. Frank, S. A. & Hurst, L. D. Mitochondria and male disease. *Nature* **383**, 224  
311 (1996).
- 312 29. Dobler, R., Rogell, B., Budar, F. & Dowling, D. K. A meta-analysis of the  
313 strength and nature of cytoplasmic genetic effects. *J. Evol. Biol.* **27**, 2021–  
314 2034 (2014).
- 315 30. Ballana, E., Mercader, J. M., Fischel-Ghodsian, N. & Estivill, X. MRPS18CP2  
316 alleles and DEFA3 absence as putative chromosome 8p23.1 modifiers of  
317 hearing loss due to mtDNA mutation A1555G in the 12S rRNA gene. *BMC Med.*  
318 *Genet.* **8**, 81 (2007).

- 319 31. Bykhovskaya, Y. *et al.* Human mitochondrial transcription factor B1 as a  
320 modifier gene for hearing loss associated with the mitochondrial A1555G  
321 mutation. *Mol. Genet. Metab.* **82**, 27–32 (2004).
- 322 32. Davidson, M. M., Walker, W. F., Hernandez-Rosa, E. & Nesti, C. Evidence for  
323 nuclear modifier gene in mitochondrial cardiomyopathy. *J. Mol. Cell. Cardiol.*  
324 **46**, 936–942 (2009).
- 325 33. Deng, J.-H. *et al.* Nuclear Suppression of Mitochondrial Defects in Cells  
326 without the ND6 Subunit. *Mol. Cell. Biol.* **26**, 1077–1086 (2006).
- 327 34. Hao, H., Morrison, L. E. & Moraes, C. T. Suppression of a Mitochondrial tRNA  
328 Gene Mutation Phenotype Associated with Changes in the Nuclear  
329 Background. *Hum. Mol. Genet.* **8**, 1117–1124 (1999).
- 330 35. Hudson, G. *et al.* Identification of an X-Chromosomal Locus and Haplotype  
331 Modulating the Phenotype of a Mitochondrial DNA Disorder. *Am. J. Hum.*  
332 *Genet.* **77**, 1086–1091 (2005).
- 333 36. Johnson, K. R., Zheng, Q. Y., Bykhovskaya, Y., Spirina, O. & Fischel-Ghodsian, N.  
334 A nuclear-mitochondrial DNA interaction affecting hearing impairment in  
335 mice. *Nat. Genet.* **27**, 191–194 (2001).
- 336 37. Potluri, P. *et al.* A novel NDUFA1 mutation leads to a progressive  
337 mitochondrial complex I- specific neurodegenerative disease. *Mol. Genet.*  
338 *Metab.* **96**, 189–195 (2009).
- 339 38. Bonaiti, B. *et al.* TTR familial amyloid polyneuropathy: does a mitochondrial  
340 polymorphism entirely explain the parent-of-origin difference in penetrance?  
341 *Eur. J. Hum. Genet.* **18**, 948–952 (2010).
- 342 39. Gershoni, M. *et al.* Disrupting Mitochondrial–Nuclear Coevolution Affects  
343 OXPHOS Complex I Integrity and Impacts Human Health. *Genome Biol. Evol.* **6**,  
344 2665–2680 (2014).
- 345 40. Kim, A, Chen, C.-H., Ursell, P. & Huang, T.-T. Genetic modifier of mitochondrial  
346 superoxide dismutase-deficient mice delays heart failure and prolongs  
347 survival - Springer. *Mamm. Genome* **21**, 534–542 (2010).
- 348 41. Strauss, K. A. *et al.* Severity of cardiomyopathy associated with adenine  
349 nucleotide translocator-1 deficiency correlates with mtDNA haplogroup. *Proc.*  
350 *Natl. Acad. Sci.* **110**, 3453–3458 (2013).
- 351 42. Vartiainen, S. *et al.* Phenotypic rescue of a Drosophila model of mitochondrial  
352 ANT1 disease. *Dis. Model. Mech.* **7**, 635–648 (2014).
- 353 43. Yan, Z. *et al.* Donor-host mitochondrial compatibility improves efficiency of  
354 bovine somatic cell nuclear transfer. *BMC Dev. Biol.* **10**, 31 (2010).
- 355 44. Yan, H. *et al.* Association between mitochondrial DNA haplotype  
356 compatibility and increased efficiency of bovine interspecies cloning. *J.*  
357 *Genet. Genomics* **38**, 21–28 (2011).
- 358 45. Zhang, J. *et al.* Pregnancy derived from human nuclear transfer. *Fertil. Steril.*  
359 **80**, 56 (2003).
- 360 46. Faul, F., Erdfelder, E., Lang, A.-G. & Buchner, A. G\*Power 3: a flexible  
361 statistical power analysis program for the social, behavioral, and biomedical  
362 sciences. *Behav. Res. Methods* **39**, 175–191 (2007).

364

Figure 1:

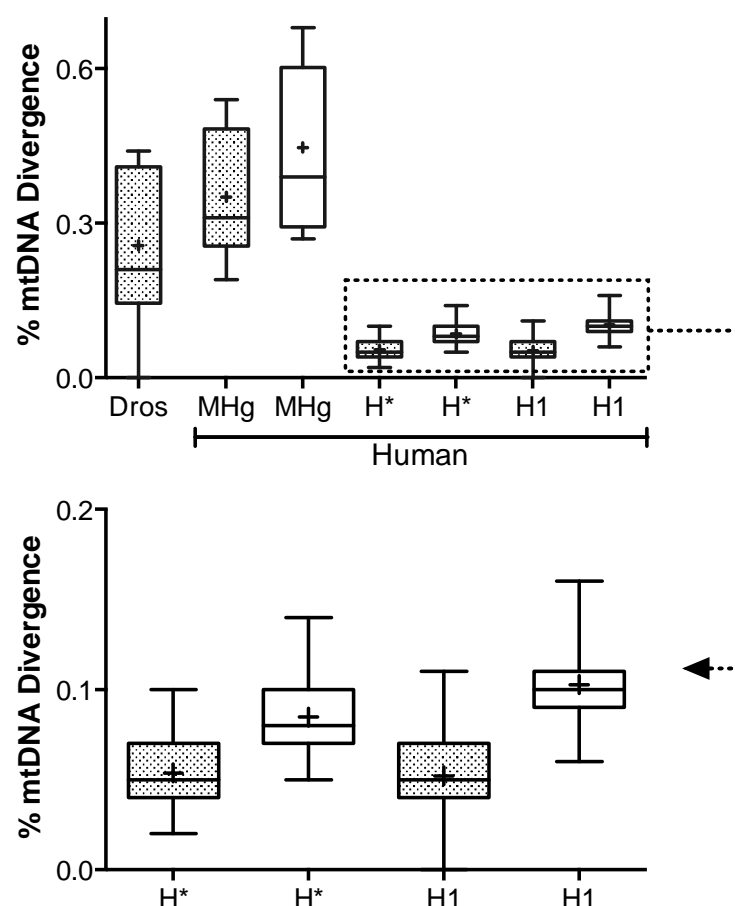

**Figure 1:** Boxplots depicting variation in mtDNA divergence (%) across naturally-occurring human mtDNA sequences, with comparison to mtDNA divergence across global fruit fly (*Drosophila melanogaster*) populations. The *Drosophila* (Dros) plot is based on protein coding regions of 13 *Drosophila melanogaster* populations that were previously used in published studies showing effects of mitochondrial replacement<sup>12,13,24</sup>. Human data are first presented using sequence polymorphisms found only in the protein coding region (denoted by hashed boxes; to enable direct comparison to the *Drosophila* plots, in which non-protein coding sequences were unavailable), and secondly using the full sequence data (protein and non-coding regions; denoted by open boxes). Human data are presented at three scales; first at the scale of human mitochondrial macro haplogroups M, N, R, L0, and L3 (MHg), second at the scale of human mitochondrial haplogroup H (sub-clades H1 to H10 [H\*]) – the most common haplogroup among Europeans, and third at the scale of haplotype, specifically 20 mitochondrial haplotypes sampled from haplogroup H1 (H1). Box plots show median values (line within box), 2<sup>nd</sup>, and 3<sup>rd</sup> quartile (box outline), maximum data range (whiskers), and mean (+). At each scale, plots are generated using pairwise divergence estimates for all combinations of mtDNA sequence.
